# Supplementary material for: Ginsenoside Rb3 Inhibits Pro-Inflammatory Cytokines via MAPK/AKT/NF-κB Pathways and Attenuates Rat Alveolar Bone Resorption in Response to Porphyromonas gingivalis LPS
Source: PubMed Central journal article supplement (PMC7588009; doi:10.3390/molecules25204815), 2020-10-20
Supplement: molecules-25-04815-s001.pdf [file molecules-25-04815-s001.pdf]

MAPK SIGNALING PATHWAY

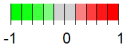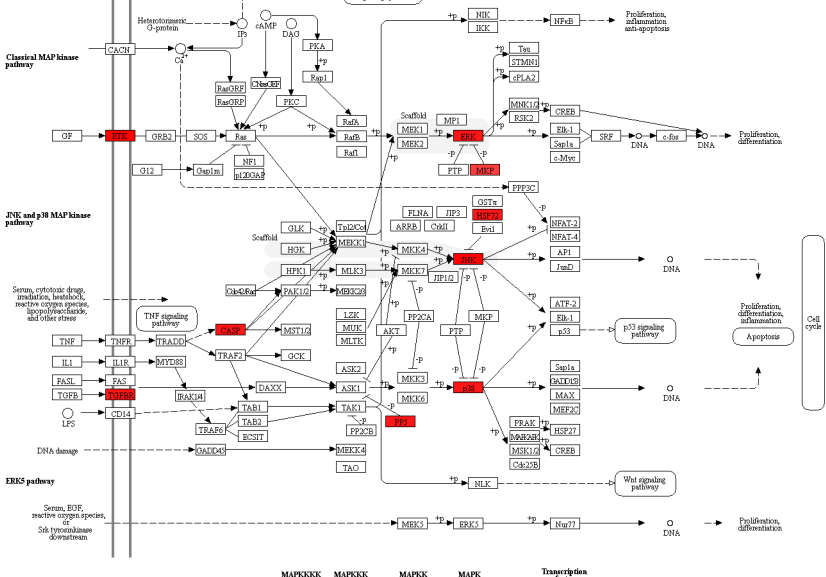

Data on KEGG graph  
Rendered by Pathview

MAPK K K K K    MAPK K K    MAPK K    MAPK    Transcription factor

→ Proliferation, differentiation
